# Supplementary material for: Improving Time Estimation in Witness Memory
Source: Front Psychol. 2019 Jun 27;10:1452. doi: 10.3389/fpsyg.2019.01452 (PMC6621925; doi:10.3389/fpsyg.2019.01452)
Supplement: Supplementary file 2 [file Data_Sheet_1.xlsx]

## Sheet: Study 1
	Data for Study !
Form	Tone	Walk	ConfidenceWalk	Case	ConfidenceCase	Unlock	ConfidenceUnlock	Remove	ConfidenceRemove	Total	ConfidenceTotal	Height	Confidence	Weight	ConfidenceWeight	VisibleCars	ConfidenceVisibleCars	Age	Gender	LPEwalk	LPEcase	LPEunlock	LPEremove	LPEtotal	LPEheight	LPEweight	SumParts	LPEsumparts	LPEcars
0	1	10	4	5	5	3	5	3	5	10	5	70	6	200	6	4	2	19	1	0.522879	-0.20412	-0.30103	-0.124939	-0.361728	-0.0172123	0.0826258	21	0	0
0	1	2	5	8	6	2	5	2	5	15	7	74	5	180	4	4	3			-0.176091	0	-0.477121	-0.30103	-0.185637	0.00692141	0.0368683	14	-0.176091	0
0	1	10	5	6	7	3	6	2	7	20	7	72	7	210	4	3	3	18	1	0.522879	-0.124939	-0.30103	-0.30103	-0.0606978	-0.00497781	0.103815	21	0	-0.124939
1	0	5	3	8	4	3	3	3	4	4	4	70	2	250	5	8	3	19	1	0.221849	0	-0.30103	-0.124939	-0.759668	-0.0172123	0.179536	19	-0.0434657	0.30103
1	0	2	6	5	6	3	4	2	5	15	5	72	6	180	6	5	5	21	0	-0.176091	-0.20412	-0.30103	-0.30103	-0.185637	-0.00497781	0.0368683	12	-0.243038	0.09691
1	1	5	3	6	3	3	6	2	5	20	5	68	5	180	4	3	6	18	1	0.221849	-0.124939	-0.30103	-0.30103	-0.0606978	-0.0298014	0.0368683	16	-0.118099	-0.124939
0	0	10	4	3	3	1	7	1	8	15	2	74	5	160	5	3	6	19	1	0.522879	-0.425969	-0.778151	-0.60206	-0.185637	0.00692141	-0.0142842	15	-0.146128	-0.124939
0	0	4	4	5	3	2	4	2	4	3	5	72	3	210	2	5	3	19	1	0.124939	-0.20412	-0.477121	-0.30103	-0.884607	-0.00497781	0.103815	13	-0.208276	0.09691
0	0	6	5	6	5	2	7	2	7	15	7	74	5	210	4	3	2	19	1	0.30103	-0.124939	-0.477121	-0.30103	-0.185637	0.00692141	0.103815	16	-0.118099	-0.124939
0	0	10	5	5	6	2	6	3	6	10	6	73	4	180	4	5	5	18	1	0.522879	-0.20412	-0.477121	-0.124939	-0.361728	0.00101255	0.0368683	20	-0.0211893	0.09691
0	1	5	7	2	7	3	7	2	7	15	7	72	7	230	7	5	6	18	1	0.221849	-0.60206	-0.30103	-0.30103	-0.185637	-0.00497781	0.143324	12	-0.243038	0.09691
0	1	2	6	10	3	1	7	1	9	5	4	69	3	150	2	3	7	18	1	-0.176091	0.09691	-0.778151	-0.60206	-0.662758	-0.0234612	-0.0423129	14	-0.176091	-0.124939
0	1	3	5	3	6	1	6	1	7	5	8	71	6	170	5	5	3	19	1	0	-0.425969	-0.778151	-0.60206	-0.662758	-0.011052	0.0120447	8	-0.419129	0.09691
1	1	7	6	5	6	3	7	2	6	10	6	74	6	230	4	3	3	18	1	0.367977	-0.20412	-0.30103	-0.30103	-0.361728	0.00692141	0.143324	17	-0.0917704	-0.124939
1	1	12	8	4	6	2	9	3	8	5	7	69	7	200	5	7	4	19	1	0.60206	-0.30103	-0.477121	-0.124939	-0.662758	-0.0234612	0.0826258	21	0	0.243038
1	1	3	5	4	5	1	6	2	7	5	7	72	5	210	5	3	2	19	1	0	-0.30103	-0.778151	-0.30103	-0.662758	-0.00497781	0.103815	10	-0.322219	-0.124939
1	1	5	6	7	5	2	4	1	6	10	4	73	4	160	3	4	3	18	1	0.221849	-0.0579919	-0.477121	-0.60206	-0.361728	0.00101255	-0.0142842	15	-0.146128	0
1	0	5	4	2	4	1	6	1	6	10	6	70	3	170	3	3	2	19	1	0.221849	-0.60206	-0.778151	-0.60206	-0.361728	-0.0172123	0.0120447	9	-0.367977	-0.124939
1	0	5	5	5	7	3	3	2	6	10	7	71	7	170	6	6	7	19	1	0.221849	-0.20412	-0.30103	-0.30103	-0.361728	-0.011052	0.0120447	15	-0.146128	0.176091
1	1	7	5	5	6	3	3	3	6	10	6	68	7	180	7	3	8	19	1	0.367977	-0.20412	-0.30103	-0.124939	-0.361728	-0.0298014	0.0368683	18	-0.0669468	-0.124939
1	0	5	6	4	4	2	6	3	6	25	6	71	5	190	5	5	3	19	1	0.221849	-0.30103	-0.477121	-0.124939	0.0362122	-0.011052	0.0603494	14	-0.176091	0.09691
1	0	6	4	3	3	2	7	2	4	4	5	71	4	190	6	10	2	18	0	0.30103	-0.425969	-0.477121	-0.30103	-0.759668	-0.011052	0.0603494	13	-0.208276	0.39794
0	1	2	3	4	4	2	7	3	6	5	3	74	4	210	3	6	2	19	1	-0.176091	-0.30103	-0.477121	-0.124939	-0.662758	0.00692141	0.103815	11	-0.280827	0.176091
0	1	2	3	3	4	5	3	5	3	10	5	73	5	190	4	8	1	18	1	-0.176091	-0.425969	-0.0791812	0.09691	-0.361728	0.00101255	0.0603494	15	-0.146128	0.30103
1	0	10	3	5	2	2	2	5	2	30	3	74	2	210	2	3	3	18	1	0.522879	-0.20412	-0.477121	0.09691	0.115393	0.00692141	0.103815	22	0.0202034	-0.124939
1	0	5	5	6	2	3	5	3	5	6	5	71	5	160	5	2	5	19	1	0.221849	-0.124939	-0.30103	-0.124939	-0.583577	-0.011052	-0.0142842	17	-0.0917704	-0.30103
1	0	5	5	7	5	3	7	3	6	15	5	71	4	180	3	5	3	18	1	0.221849	-0.0579919	-0.30103	-0.124939	-0.185637	-0.011052	0.0368683	18	-0.0669468	0.09691
1	0	5	8	2	9	1	0	1	9	10	9	72	8	175	8	5	8	18	1	0.221849	-0.60206	-0.778151	-0.60206	-0.361728	-0.00497781	0.0246338	9	-0.367977	0.09691
0	1	7	3	5	4	1	6	2	5	7	5	70	3	180	3	5	5	20	1	0.367977	-0.20412	-0.778151	-0.30103	-0.51663	-0.0172123	0.0368683	15	-0.146128	0.09691
0	1	5	4	3	7	3	7	5	7	8	6	74	4	190	3	9	7	18	1	0.221849	-0.425969	-0.30103	0.09691	-0.458638	0.00692141	0.0603494	16	-0.118099	0.352183
0	1	5	7	10	7	2	6	5	6	25	6	72	7	220	4	4	6	18	1	0.221849	0.09691	-0.477121	0.09691	0.0362122	-0.00497781	0.124018	22	0.0202034	0
0	1	15	6	3	6	1	5	2	5	10	6	72	6	200	5	5	5	19	1	0.69897	-0.425969	-0.778151	-0.30103	-0.361728	-0.00497781	0.0826258	21	0	0.09691
0	1	3	4	11	5	1	5	3	5	22	4	71	5	190	3	4	4	18	1	0	0.138303	-0.778151	-0.124939	-0.0193052	-0.011052	0.0603494	18	-0.0669468	0
1	1	5	3	3	3	3	5	2	4	10	3	69	3	200	4	8	4	18	1	0.221849	-0.425969	-0.30103	-0.30103	-0.361728	-0.0234612	0.0826258	13	-0.208276	0.30103
1	1	8	5	5	5	3	6	3	7	6	6	69	3	180	2	2	4	19	1	0.425969	-0.20412	-0.30103	-0.124939	-0.583577	-0.0234612	0.0368683	19	-0.0434657	-0.30103
1	1	5	4	2	3	1	4	2	3	10	4	70	4	200	3	5	3	18	1	0.221849	-0.60206	-0.778151	-0.30103	-0.361728	-0.0172123	0.0826258	10	-0.322219	0.09691
1	1	10	3	5	5	3	5	2	5	20	5	69	3	190	2	6	2	19	1	0.522879	-0.20412	-0.30103	-0.30103	-0.0606978	-0.0234612	0.0603494	20	-0.0211893	0.176091
0	0	3	6	10	6	2	7	2	7	7	6	73	6	195	5	5	5	18	1	0	0.09691	-0.477121	-0.30103	-0.51663	0.00101255	0.0716304	17	-0.0917704	0.09691
0	0	15	6	8	6	5	7	3	7	30	7	73	6	195	5	4	3	18	1	0.69897	0	-0.0791812	-0.124939	0.115393	0.00101255	0.0716304	31	0.169142	0
0	0	5	5	7	4	2	6	2	5	13	4	70	5	190	3	8	6	19	1	0.221849	-0.0579919	-0.477121	-0.30103	-0.247784	-0.0172123	0.0603494	16	-0.118099	0.30103
1	1	5	5	3	5	1	4	1	4	3	4	73	4	190	4	5	3	18	1	0.221849	-0.425969	-0.778151	-0.60206	-0.884607	0.00101255	0.0603494	10	-0.322219	0.09691
0	1	5	5	6	4	2	4	2	5	15	4	71	5	190	3	7	6	19	1	0.221849	-0.124939	-0.477121	-0.30103	-0.185637	-0.011052	0.0603494	15	-0.146128	0.243038
0	0	7	4	5	4	2	4	5	4	34	4	73	4	180	4	4	5	19	1	0.367977	-0.20412	-0.477121	0.09691	0.169751	0.00101255	0.0368683	19	-0.0434657	0
0	0	7	4	2	7	2	6	2	5	3	6	70	5	200	3	3	4	20	1	0.367977	-0.60206	-0.477121	-0.30103	-0.884607	-0.0172123	0.0826258	13	-0.208276	-0.124939
0	0	20	2	10	5	5	3	4	2	6	5	73	7	175	3	9	3	18	1	0.823909	0.09691	-0.0791812	0	-0.583577	0.00101255	0.0246338	39	0.268845	0.352183
1	0	6	3	6	3	2	4	4	4	60	7	65	7	160	4	3	4	18	1	0.30103	-0.124939	-0.477121	0	0.416423	-0.049397	-0.0142842	18	-0.0669468	-0.124939
1	0	5	6	3	5	1	6	1	7	10	5	72	3	200	2	6	2	18	1	0.221849	-0.425969	-0.778151	-0.60206	-0.361728	-0.00497781	0.0826258	10	-0.322219	0.176091
1	0	15	6	7	5	8	5	5	5	25	5	72	6	215	5	6	5	19	1	0.69897	-0.0579919	0.124939	0.09691	0.0362122	-0.00497781	0.114034	35	0.221849	0.176091
0	0	8	6	5	6	5	5	4	5	10	7	73	6	200	5	8	5	19	1	0.425969	-0.20412	-0.0791812	0	-0.361728	0.00101255	0.0826258	22	0.0202034	0.30103
0	1	4	6	6	6	2	7	2	7	15	7	70	6	180	8	4	3	20	0	0.124939	-0.124939	-0.477121	-0.30103	-0.185637	-0.0172123	0.0368683	14	-0.176091	0
0	0	5	7	3	5	4	5	4	5	15	7	73	7	185	5	3	6	18	1	0.221849	-0.425969	-0.176091	0	-0.185637	0.00101255	0.0487675	16	-0.118099	-0.124939
0	0	10	5	15	7	2	8	5	7	10	7	72	6	200	7	1	3	18	1	0.522879	0.273001	-0.477121	0.09691	-0.361728	-0.00497781	0.0826258	32	0.182931	-0.60206
1	0	5	5	6	5	3	5	2	5	20	5	72	5	190	4	8	3	18	1	0.221849	-0.124939	-0.30103	-0.30103	-0.0606978	-0.00497781	0.0603494	16	-0.118099	0.30103
1	1	4	4	1	3	1	3	2	3	4	1	72	2	150	2	3	2	19	1	0.124939	-0.90309	-0.778151	-0.30103	-0.759668	-0.00497781	-0.0423129	8	-0.419129	-0.124939
1	1	8	5	3	5	2	6	4	4	17	6	72	5	210	5	5	2	19	1	0.425969	-0.425969	-0.477121	0	-0.131279	-0.00497781	0.103815	17	-0.0917704	0.09691
1	0	5	6	5	6	3	7	5	6	15	4	72	6	230	6	3	3	19	1	0.221849	-0.20412	-0.30103	0.09691	-0.185637	-0.00497781	0.143324	18	-0.0669468	-0.124939
1	0	10	6	30	6	5	6	5	7	60	5	72	5	200	4	3	4	18	1	0.522879	0.574031	-0.0791812	0.09691	0.416423	-0.00497781	0.0826258	50	0.376751	-0.124939
1	0	7	6	6	7	4	7	3	7	20	6	71	6	160	6	4	4	19	0	0.367977	-0.124939	-0.176091	-0.124939	-0.0606978	-0.011052	-0.0142842	20	-0.0211893	0
1	1	3	4	5	3	3	5	3	4	15	4	72	4	205	3	4	3	18	1	0	-0.20412	-0.30103	-0.124939	-0.185637	-0.00497781	0.0933497	14	-0.176091	0
0	0	15	5	3	3	2	5	2	7	5	6	74	5	180	6	7	3	38	0	0.69897	-0.425969	-0.477121	-0.30103	-0.662758	0.00692141	0.0368683	22	0.0202034	0.243038
1	1	2	3	3	6	2	7	2	7	7	7	73	6	190	5	8	4	19	0	-0.176091	-0.425969	-0.477121	-0.30103	-0.51663	0.00101255	0.0603494	9	-0.367977	0.30103
1	1	10	6	13	4	5	5	25	5	45	6	72	5	180	4	10	5	20	1	0.522879	0.210853	-0.0791812	0.79588	0.291485	-0.00497781	0.0368683	53	0.402057	0.39794
1	1	10	5	15	6	5	4	2	4	20	7	71	4	175	4	5	2	19	1	0.522879	0.273001	-0.0791812	-0.30103	-0.0606978	-0.011052	0.0246338	32	0.182931	0.09691
1	1	2	4	5	4	1	6	3	5	10	4	72	2	200	2	6	3	22	1	-0.176091	-0.20412	-0.778151	-0.124939	-0.361728	-0.00497781	0.0826258	11	-0.280827	0.176091
1	1	10	7	6	7	5	8	3	9	20	6	72	6	185	7	6	7	17	1	0.522879	-0.124939	-0.0791812	-0.124939	-0.0606978	-0.00497781	0.0487675	24	0.0579919	0.176091
1	1	10	6	5	6	3	7	2	6	20	6	72	6	180	7	7	2	18	1	0.522879	-0.20412	-0.30103	-0.30103	-0.0606978	-0.00497781	0.0368683	20	-0.0211893	0.243038
