# Supplementary material for: Improving Time Estimation in Witness Memory
Source: Front Psychol. 2019 Jun 27;10:1452. doi: 10.3389/fpsyg.2019.01452 (PMC6621925; doi:10.3389/fpsyg.2019.01452)
Supplement: Supplementary file 3 [file Data_Sheet_2.xlsx]

## Sheet: Study 2
Data for Study 2
Form	Tone	TotalCrime	ConfidenceCrime	HeightPerp	ConfidenceHeight	WeightPerp	ConfidenceWight	VisibleCars	ConfidenceCars	WalkUp	ConfidenceWalkUp	CaseCar	ConfidenceCase	Unlock	ConfidenceUnlock	Remove	ConfidenceRemove	WalkAway	ConfidenceWalkAway	Age	Gender	Height	Weight	SurveyDuration	LPEwalkup	LPEcase	LPEunlock	LPEremove	LPEwalkaway	LPEtotal	LPEheight	LPEweight	LPEcars	LPEsum	Sum
1	0	30	6	70	5	190	4	3	5	15	5	10	5	18	5	5	6	6	5	39	1	69	290	135	0.69897	0.09691	0.477121	0.09691	0.477121	0.115393	-0.0172123	0.0603494	-0.124939	0.370666	54
1	0	60	4	70	5	175	3	8	4	5	4	10	4	15	5	10	7	5	6	46	1	66	225	239	0.221849	0.09691	0.39794	0.39794	0.39794	0.416423	-0.0172123	0.0246338	0.30103	0.291485	45
1	1	15	4	69	5	170	4	4	5	10	6	10	4	15	4	5	4	10	5	51	1	61	126	2036	0.522879	0.09691	0.39794	0.09691	0.69897	-0.185637	-0.0234612	0.0120447	0	0.337242	50
1	0	50	7	74		180	7	5	7	30	7	40	7	10	7	10	7	20	7	32	0	62	130	283	1	0.69897	0.221849	0.39794	1	0.337242	0.00692141	0.0368683	0.09691	0.679665	110
0	0	10	6	72	4	180	5	6	4	30	3	15	4	10	5	10	5	10	6	26	0	70	195	230	1	0.273001	0.221849	0.39794	0.69897	-0.361728	-0.00497781	0.0368683	0.176091	0.513333	75
0	0	30	5	74	4	175	4	8	1	15	1	10	3	10	4	5	6	5	4	30	0	74	175	202	0.69897	0.09691	0.221849	0.09691	0.39794	0.115393	0.00692141	0.0246338	0.30103	0.291485	45
0	0	20	4	73	4	160	4	3	3	5	4	10	3	10	4	10	1	5	7	51	1	61		177	0.221849	0.09691	0.221849	0.39794	0.39794	-0.0606978	0.00101255	-0.0142842	-0.124939	0.240332	40
1	1	30	5	74	5	180	5	5	4	30	6	5	4	10	5	5	5	3	6	32	0	69	190	130	1	-0.20412	0.221849	0.09691	0.176091	0.115393	0.00692141	0.0368683	0.09691	0.362548	53
1	1	30	4	70	3	170	4	3	2	5	4	10	4	8	5	5	3	3	4	41	1	64	200	155	0.221849	0.09691	0.124939	0.09691	0.176091	0.115393	-0.0172123	0.0120447	-0.124939	0.129634	31
0	0	60	4	70	2	175	3	4	2	20	4	5	4	7	4	10	4	5	4	23	1	64	125	193	0.823909	-0.20412	0.0669468	0.39794	0.39794	0.416423	-0.0172123	0.0246338	0	0.31037	47
1	0	30	4	72	3	175	3	6	1	10	5	5	4	7	5	5	6	3	6	44	0	71	185	155	0.522879	-0.20412	0.0669468	0.09691	0.176091	0.115393	-0.00497781	0.0246338	0.176091	0.115393	30
0	0	20	3	68	2	185	1	4	1	7	3	8	1	6	1	4	1	3	1	23	1	63	153	194	0.367977	0	0	0	0.176091	-0.0606978	-0.0298014	0.0487675	0	0.0854302	28
1	0	20	4	71	3	175	3	4	2	2	4	3	4	6	4	2	4	5	3	54	1	62	170	1005	-0.176091	-0.425969	0	-0.30103	0.39794	-0.0606978	-0.011052	0.0246338	0	-0.106455	18
0	1	60	4	73	4	185	4	4	4	10	4	15	4	5	4	7	4	2	4	39	1	66	185	192	0.522879	0.273001	-0.0791812	0.243038	0	0.416423	0.00101255	0.0487675	0	0.229337	39
0	1	45	5	73	4	200	3	5	2	15	3	15		5	4	10	4	5	4	46	0	70	200	275	0.69897	0.273001	-0.0791812	0.39794	0.39794	0.291485	0.00101255	0.0826258	0.09691	0.337242	50
1	1	30	5	72	2	175	3	5	3	10	6	15	6	5	7	10	6	5	4	52	1	67	130	323	0.522879	0.273001	-0.0791812	0.39794	0.39794	0.115393	-0.00497781	0.0246338	0.09691	0.291485	45
0	1	40	4	73	5	200	3	6	2	15	4	10	5	5	6	10	5	3	5	47	1	70	140	268	0.69897	0.09691	-0.0791812	0.39794	0.176091	0.240332	0.00101255	0.0826258	0.176091	0.271741	43
1	1	35	7	73	4	170	4	8	2	10	5	10	7	5	7	5	7	3	7	70	1	65	138	311	0.522879	0.09691	-0.0791812	0.09691	0.176091	0.18234	0.00101255	0.0120447	0.30103	0.156786	33
0	1	30	3	70	3	175	2	2	4	5	1	10	2	5	3	10	3	5	4	61	1	66	150	251	0.221849	0.09691	-0.0791812	0.39794	0.39794	0.115393	-0.0172123	0.0246338	-0.30103	0.18234	35
0	0	30	4	73	1	180	1	4	1	20	4	10	8	5	3	2	4	3	4	22	0	70	210	151	0.823909	0.09691	-0.0791812	-0.30103	0.176091	0.115393	0.00101255	0.0368683	0	0.240332	40
1	0	25	4	74	6	180	4	5	4	5	4	10	5	5	4	4	4	3	4	26	0	68	140	136	0.221849	0.09691	-0.0791812	0	0.176091	0.0362122	0.00692141	0.0368683	0.09691	0.0696359	27
1	1	23	3	73	4	250	1	5	1	3	3	10	3	5	3	3	3	2	4	25	1	64	280	210	0	0.09691	-0.0791812	-0.124939	0	0	0.00101255	0.179536	0.09691	0	23
1	0	20	1	66	1	160	1	2	5	15	2	10	2	5	3	3	4	2	2	56	1	64	150	281	0.69897	0.09691	-0.0791812	-0.124939	0	-0.0606978	-0.0427664	-0.0142842	-0.30103	0.18234	35
0	0	15	5	69	4	170	5	4	4	10	4	10	4	5	6	5	6	5	5	46	1	60	115	243	0.522879	0.09691	-0.0791812	0.09691	0.39794	-0.185637	-0.0234612	0.0120447	0	0.18234	35
0	1	15	4	69	2	170	3	4	1	5	1	10	3	5	3	3	4	2	4	46	0	69	165	259	0.221849	0.09691	-0.0791812	-0.124939	0	-0.185637	-0.0234612	0.0120447	0	0.0362122	25
0	0	10	4	64	5	176.37	5	6	4	20	5	10	4	5	6	5	6	15	4	32	0	62	165.347	270	0.823909	0.09691	-0.0791812	0.09691	0.875061	-0.361728	-0.0561303	0.0280205	0.176091	0.378635	55
0	0	10	5	70	3	180	4	3	4	20	5	10	5	5	5	5	5	4	4	49	1	65	160	251	0.823909	0.09691	-0.0791812	0.09691	0.30103	-0.361728	-0.0172123	0.0368683	-0.124939	0.281725	44
0	0	40	4	70	2	190	4	4	1	7	5	6	5	5	5	4	5	2	6	36	0	69	190	358	0.367977	-0.124939	-0.0791812	0	0	0.240332	-0.0172123	0.0603494	0	0.0184834	24
1	0	60	2	70	2	160	2	4	2	20	3	5	4	5	4	3	4	3	4	23	0	71	175	157	0.823909	-0.20412	-0.0791812	-0.124939	0.176091	0.416423	-0.0172123	-0.0142842	0	0.194575	36
1	1	50	2	76	2	200	3	6	1	10	3	5	4	5	4	15	3	8	3	32	1	64	120	162	0.522879	-0.20412	-0.0791812	0.574031	0.60206	0.337242	0.0185033	0.0826258	0.176091	0.271741	43
1	0	40	5	71	4	170	4	4	1	15	4	5	4	5	7	5	7	5	6	31	0	70	150	2353	0.69897	-0.20412	-0.0791812	0.09691	0.39794	0.240332	-0.011052	0.0120447	0	0.18234	35
1	0	30	5	73	2	210	2	5	1	10	4	5	4	5	4	4	4	2	3	30	0	70	165	226	0.522879	-0.20412	-0.0791812	0	0	0.115393	0.00101255	0.103815	0.09691	0.0532455	26
1	0	30	3	72	4	180	4	2	1	10	4	5	4	5	4	2	4	2	4	29	1	61	100	137	0.522879	-0.20412	-0.0791812	-0.30103	0	0.115393	-0.00497781	0.0368683	-0.30103	0.0184834	24
0	0	30	4	72	4	200	4	4	4	10	4	5	4	5	4	5	4	10	4	42	0	71	285	161	0.522879	-0.20412	-0.0791812	0.09691	0.69897	0.115393	-0.00497781	0.0826258	0	0.18234	35
0	1	30	5	74	5	175	3	4	4	10	5	5	4	5	4	5	4	5	4	27	1	69	147	139	0.522879	-0.20412	-0.0791812	0.09691	0.39794	0.115393	0.00692141	0.0246338	0	0.115393	30
0	0	30	1	73	3	200	3	3	1	10	4	5	4	5	4	8	3	5	4	34	1	63	135	411	0.522879	-0.20412	-0.0791812	0.30103	0.39794	0.115393	0.00101255	0.0826258	-0.124939	0.156786	33
0	1	30	6	72	6	200	6	5	6	5	5	5	6	5	6	5	6	5	6	59	1	66	160	323	0.221849	-0.20412	-0.0791812	0.09691	0.39794	0.115393	-0.00497781	0.0826258	0.09691	0.0362122	25
1	1	25	2	71	3	190	1	2	1	7	4	5	3	5	6	4	5	3	4	21	0	71	285	147	0.367977	-0.20412	-0.0791812	0	0.176091	0.0362122	-0.011052	0.0603494	-0.30103	0.0184834	24
1	0	25	4	69	4	170	4	2	3	7	4	5	4	5	4	4	4	3	4	44	1	70	135	301	0.367977	-0.20412	-0.0791812	0	0.176091	0.0362122	-0.0234612	0.0120447	-0.30103	0.0184834	24
1	1	22	3	73	2	180	2	7	3	7	4	5	4	5	4	3	4	2	3	39	1	66	175	209	0.367977	-0.20412	-0.0791812	-0.124939	0	-0.0193052	0.00101255	0.0368683	0.243038	-0.0193052	22
1	0	20	6	71	5	185	4	8	3	5	5	5	5	5	7	5	7	5	7	48	0	70	182	244	0.221849	-0.20412	-0.0791812	0.09691	0.39794	-0.0606978	-0.011052	0.0487675	0.30103	0.0362122	25
0	0	20	4	71	4	200	5	5	1	5	3	5	5	5	5	5	4	5	4	40	0	72	240	204	0.221849	-0.20412	-0.0791812	0.09691	0.39794	-0.0606978	-0.011052	0.0826258	0.09691	0.0362122	25
1	1	10	4	68	4	180	3	5	4	5	5	5	5	5	5	2	5	2	6	46	0	67	160	546	0.221849	-0.20412	-0.0791812	-0.30103	0	-0.361728	-0.0298014	0.0368683	0.09691	-0.0829742	19
0	1	10	4	72	3	150	3	3	2	5	4	5	4	5	3	5	3	3	4	57	1	61	118	218	0.221849	-0.20412	-0.0791812	0.09691	0.176091	-0.361728	-0.00497781	-0.0423129	-0.124939	0	23
0	0	20	6	77	5	170	5	3	3	6	5	4	5	5	4	3	4	3	5	28	0	65	139	291	0.30103	-0.30103	-0.0791812	-0.124939	0.176091	-0.0606978	0.0241804	0.0120447	-0.124939	-0.0395085	21
0	1	26	4	70	7	150	3	5	4	7	2	3	2	5	2	3	4	2	4	47	1	65	118	855	0.367977	-0.425969	-0.0791812	-0.124939	0	0.0532455	-0.0172123	-0.0423129	0.09691	-0.0606978	20
1	0	45	4	68	4	140	4	2	5	7	4	10	4	4	4	4	4	3	6	28	0	72	190	218	0.367977	0.09691	-0.176091	0	0.176091	0.291485	-0.0298014	-0.0722762	-0.30103	0.0854302	28
0	1	17	5	69	4	180	4	8	4	17	5	8	4	4	5	6	5	3	4	32	0	75	185	181	0.753328	0	-0.176091	0.176091	0.176091	-0.131279	-0.0234612	0.0368683	0.30103	0.218056	38
1	1	25	4	72	4	175	4	8	3	10	4	5	3	4	4	5	4	3	5	31	2	73	150	182	0.522879	-0.20412	-0.176091	0.09691	0.176091	0.0362122	-0.00497781	0.0246338	0.30103	0.0696359	27
1	1	24	5	70	4	185	4	5	3	10	5	4	4	4	5	4	5	2	4	54	1	64	165	377	0.522879	-0.30103	-0.176091	0	0	0.0184834	-0.0172123	0.0487675	0.09691	0.0184834	24
0	1	10	5	69	4	170	5	3	3	15	3	3	5	4	5	3	5	3	6	32	0	68	160	148	0.69897	-0.425969	-0.176091	-0.124939	0.176091	-0.361728	-0.0234612	0.0120447	-0.124939	0.0854302	28
1	0	35	6	72	4	215	5	4	5	5	6	20	5	3	4	3	5	2	5	26	0	76	325	173	0.221849	0.39794	-0.30103	-0.124939	0	0.18234	-0.00497781	0.114034	0	0.156786	33
1	0	30	6	72	5	175	5	4	6	20	6	10	6	3	7	5	7	4	7	52	1	68	157	706	0.823909	0.09691	-0.30103	0.09691	0.30103	0.115393	-0.00497781	0.0246338	0	0.261521	42
0	1	30	6	70	5	175	5	4	4	5	6	10	4	3	4	3	6	4	5	40	1	63	240	210	0.221849	0.09691	-0.30103	-0.124939	0.30103	0.115393	-0.0172123	0.0246338	0	0.0362122	25
0	1	25	3	71	4	195	4	3	2	10	2	10	2	3	2	5	3	10	2	25	0	73	259	209	0.522879	0.09691	-0.30103	0.09691	0.69897	0.0362122	-0.011052	0.0716304	-0.124939	0.218056	38
1	1	25	6	72	4	180	3	3	4	5	4	10	5	3	6			2	6	31	1	64	280	475	0.221849	0.09691	-0.30103		0	0.0362122	-0.00497781	0.0368683	-0.124939
0	1	20	5	70	7	185	4	7	6	5	3	10	6	3	7	3	5	3	7	42	0	71	165	278	0.221849	0.09691	-0.30103	-0.124939	0.176091	-0.0606978	-0.0172123	0.0487675	0.243038	0.0184834	24
0	1	20	6	70	5	205	4	7	3	5	4	10	3	3	5	8	5	3	4	53	0	69	225	218	0.221849	0.09691	-0.30103	0.30103	0.176091	-0.0606978	-0.0172123	0.0933497	0.243038	0.10067	29
1	0	15	2	73	4	180	5	3	6	7	3	9	2	3	5	2	6	3	5	33	0	67	220	652	0.367977	0.0511525	-0.30103	-0.30103	0.176091	-0.185637	0.00101255	0.0368683	-0.124939	0.0184834	24
1	0	25	5	72	2	155	2	4	4	8	5	8	5	3	7	4	6	3	5	39	0	65	180	811	0.425969	0	-0.30103	0	0.176091	0.0362122	-0.00497781	-0.0280725	0	0.0532455	26
1	0	17	3	71	1	180	3	3	2	5	3	8	4	3	2	2	4	3	4	29	1	63	120	231	0.221849	0	-0.30103	-0.30103	0.176091	-0.131279	-0.011052	0.0368683	-0.124939	-0.0395085	21
0	1	30	4	69	4	200	4	5	2	10	4	7	4	3	4	10	4	2	4	37	1	69	267	388	0.522879	-0.0579919	-0.30103	0.39794	0	0.115393	-0.0234612	0.0826258	0.09691	0.143422	32
0	1	20	4	69	2	175	1	5	4	3	5	7	5	3	4	5	6	3	4	25	0	74	180	195	0	-0.0579919	-0.30103	0.09691	0.176091	-0.0606978	-0.0234612	0.0246338	0.09691	-0.0395085	21
1	1	19	4	74	4	185	2	5	2	4	4	7	5	3	5	3	5	2	4	53	0	72	270	338	0.124939	-0.0579919	-0.30103	-0.124939	0	-0.0829742	0.00692141	0.0487675	0.09691	-0.0829742	19
1	1	15	4	71	4	165	6	8	2	5	4	7	5	3	6	4	5			37	0	70	165	171	0.221849	-0.0579919	-0.30103	0		-0.185637	-0.011052	-0.000920255	0.30103
1	0	26	7	69	4	140	4	5	6	10	7	6	7	3	7	4	7	3	7	37	0	71	152	370	0.522879	-0.124939	-0.30103	0	0.176091	0.0532455	-0.0234612	-0.0722762	0.09691	0.0532455	26
0	1	15	5	68	4	165	3	5	1	8	3	6	4	3	5	7	6	5	5	44	1	69	170	266	0.425969	-0.124939	-0.30103	0.243038	0.39794	-0.185637	-0.0298014	-0.000920255	0.09691	0.10067	29
0	1	5	7	70	4	185	3	4	2	5	3	6	2	3	4	2	4	2	3	34	0	74	225	198	0.221849	-0.124939	-0.30103	-0.30103	0	-0.662758	-0.0172123	0.0487675	0	-0.106455	18
1	0	40	4	70	5	180	4	4	6	25	5	5	5	3	5	3	5	5	4	32	0	68	170	395	0.920819	-0.20412	-0.30103	-0.124939	0.39794	0.240332	-0.0172123	0.0368683	0	0.251056	41
1	0	30	7	73	6	200	4	3	4	10	7	5	7	3	7	2	7	2	7	29	0	69	175	194	0.522879	-0.20412	-0.30103	-0.30103	0	0.115393	0.00101255	0.0826258	-0.124939	-0.0193052	22
0	1	30	4	70	4	150	5	8	6	4	5	5	5	3	5	3	5	2	5	36	1	62	160	197	0.124939	-0.20412	-0.30103	-0.124939	0	0.115393	-0.0172123	-0.0423129	0.30103	-0.131279	17
0	0	30	5	72	6	75	6	5	5	5	5	5	6	3	6	3	5	2	6	30	0	70	175	276	0.221849	-0.20412	-0.30103	-0.124939	0	0.115393	-0.00497781	-0.343343	0.09691	-0.106455	18
1	1	25	5	73	4	165	6	4	4	15	6	5	7	3	5	4	4	5	7	40	0	68	215	302	0.69897	-0.20412	-0.30103	0	0.39794	0.0362122	0.00101255	-0.000920255	0	0.143422	32
0	1	25	4	72	6	165	6	8	2	6	3	5	3	3	2	3	4	3	3	29	0	63	110	511	0.30103	-0.20412	-0.30103	-0.124939	0.176091	0.0362122	-0.00497781	-0.000920255	0.30103	-0.0606978	20
0	0	25	4	72	4	200	4	10	3	3	4	5	4	3	6	3	5	3	4	45	0	75	175	229	0	-0.20412	-0.30103	-0.124939	0.176091	0.0362122	-0.00497781	0.0826258	0.39794	-0.131279	17
1	1	25	3	74	5	200	4	4	3	8	4	5	4	3	6	4	4	2	7	44	0	71	260	155	0.425969	-0.20412	-0.30103	0	0	0.0362122	0.00692141	0.0826258	0	-0.0193052	22
1	0	22	7	72	7	175	7	7	6	10	6	5	6	3	6	6	6	3	7	36	0	66	152	488	0.522879	-0.20412	-0.30103	0.176091	0.176091	-0.0193052	-0.00497781	0.0246338	0.243038	0.0696359	27
0	0	20	7	72	5	200	5	4	6	10	6	5	5	3	7	3	7	2	6	26	0	66	150	788	0.522879	-0.20412	-0.30103	-0.124939	0	-0.0606978	-0.00497781	0.0826258	0	0	23
0	0	20	4	72	2	175	2	2	2	5	2	5	2	3	2	2	2	2	2	39	0	71	195	130	0.221849	-0.20412	-0.30103	-0.30103	0	-0.0606978	-0.00497781	0.0246338	-0.30103	-0.131279	17
0	0	20	4	74	4	195	4	5	4	5	4	5	4	3	5	3	6	3	5	44	1	62	115	233	0.221849	-0.20412	-0.30103	-0.124939	0.176091	-0.0606978	0.00692141	0.0716304	0.09691	-0.0829742	19
1	1	18	4	69	5	165	6	7	6	5	8	5	6	3	6	2	7	2	6	61	1	64	145	463	0.221849	-0.20412	-0.30103	-0.30103	0	-0.106455	-0.0234612	-0.000920255	0.243038	-0.131279	17
1	0	17	6	72	6	195	3	4	2	5	6	5	6	3	7	3	4	2	7	28	1	66	160	216	0.221849	-0.20412	-0.30103	-0.124939	0	-0.131279	-0.00497781	0.0716304	0	-0.106455	18
0	0	15	3	73	4	180	4	4	2	3	4	5	4	3	4	3	4	1	5	30	0	73	165	124	0	-0.20412	-0.30103	-0.124939	-0.30103	-0.185637	0.00101255	0.0368683	0	-0.185637	15
0	1	10	4	72	2	180	2	3	1	3	4	5	4	3	4	3	5	2	4	40	0	70	160	245	0	-0.20412	-0.30103	-0.124939	0	-0.361728	-0.00497781	0.0368683	-0.124939	-0.157608	16
0	1	10	4	72	4	190	4	4	4	5	4	5	4	3	4	7	4	3	4	41	1	65	145	500	0.221849	-0.20412	-0.30103	0.243038	0.176091	-0.361728	-0.00497781	0.0603494	0	0	23
0	1	10	2	72	3	180	2	3	1	5	2	5	1	3	1	2	1	3	1	35	0	73	205	156	0.221849	-0.20412	-0.30103	-0.30103	0.176091	-0.361728	-0.00497781	0.0368683	-0.124939	-0.106455	18
0	1	10	4	70	4	210	4	3	2	10	5	5	4	3	6	5	5	2	6	41	1	66	140	361	0.522879	-0.20412	-0.30103	0.09691	0	-0.361728	-0.0172123	0.103815	-0.124939	0.0362122	25
0	1	9	4	73	6	205	5	7	2	8	2	5	5	3	6	4	4	3	3	32	0	65	130	116	0.425969	-0.20412	-0.30103	0	0.176091	-0.407485	0.00101255	0.0933497	0.243038	0	23
0	0	25	6	74	5	155	4	5	6	3	4	3	5	3	6	8	4	4	5	32	0	72	133	442	0	-0.425969	-0.30103	0.30103	0.30103	0.0362122	0.00692141	-0.0280725	0.09691	-0.0395085	21
1	1	20	5	73	4	170	4	4	6	5	5	3	5	3	6	5	5	2	6	42	0	73	488	193	0.221849	-0.425969	-0.30103	0.09691	0	-0.0606978	0.00101255	0.0120447	0	-0.106455	18
1	0	20	1	72	1	200	1	3	4	10	4	3	4	3	4	1	4	3	4	49	1	65	120	227	0.522879	-0.425969	-0.30103	-0.60206	0.176091	-0.0606978	-0.00497781	0.0826258	-0.124939	-0.0606978	20
1	0	15	5	70	3	145	4	1	3	2	4	3	5	3	6	2	6	2	5	45	1	65	136	1754	-0.176091	-0.425969	-0.30103	-0.30103	0	-0.185637	-0.0172123	-0.0570362	-0.60206	-0.282547	12
1	0	12	2	72	4	190	4	2	2	5	3	3	3	3	2	2	3	2	2	34	0	73	170	232	0.221849	-0.425969	-0.30103	-0.30103	0	-0.282547	-0.00497781	0.0603494	-0.30103	-0.185637	15
0	0	12	5	69	3	185	4	4	6	6	4	3	6	3	6	4	6	5	2	31	0	65	163	118	0.30103	-0.425969	-0.30103	0	0.39794	-0.282547	-0.0234612	0.0487675	0	-0.0395085	21
0	0	10	3	71	2	175	2	4	3	3	4	3	4	3	4	3	4	1	4	41	1	68	140	192	0	-0.425969	-0.30103	-0.124939	-0.30103	-0.361728	-0.011052	0.0246338	0	-0.247784	13
1	0	10	4	75	3	210	4	4	2	5	3	3	7	3	4	2	6	3	7	30	1	66	232	202	0.221849	-0.425969	-0.30103	-0.30103	0.176091	-0.361728	0.012751	0.103815	0	-0.157608	16
0	0	3	4	68	1	120	1	3	1	10	1	2	1	3	1	1	1	5	1	35	0	63	180	144	0.522879	-0.60206	-0.30103	-0.60206	0.39794	-0.884607	-0.0298014	-0.139223	-0.124939	-0.0395085	21
1	1	40	5	70	4	190	5	6	5	5	5	20	6	2	5	5	6	2	7	35	0	70	225	507	0.221849	0.39794	-0.477121	0.09691	0	0.240332	-0.0172123	0.0603494	0.176091	0.169751	34
1	1	20	4	74	5	220	4	3	2	3	5	20	4	2	5	8	4	3	4	29	1	68	150	177	0	0.39794	-0.477121	0.30103	0.176091	-0.0606978	0.00692141	0.124018	-0.124939	0.194575	36
0	1	23	7	72	4	205	4	6	4	3	4	10	4	2	4	3	4	2	4	66	1	64	123	498	0	0.09691	-0.477121	-0.124939	0	0	-0.00497781	0.0933497	0.176091	-0.0606978	20
0	0	15	3	71	2	160	4	4	3	10	4	10	4	2	5	5	5	5	4	27	0	70	170	139	0.522879	0.09691	-0.477121	0.09691	0.39794	-0.185637	-0.011052	-0.0142842	0	0.143422	32
0	0	4	6	71	4	185	4	2	2	10	4	10	5	2	5	2	5	2	5	34	0	70	185	201	0.522879	0.09691	-0.477121	-0.30103	0	-0.759668	-0.011052	0.0487675	-0.30103	0.0532455	26
1	1	20	7	70	7	170	7	5	7	3	7	9	7	2	7	2	7	3	7		0			1821	0	0.0511525	-0.477121	-0.30103	0.176091	-0.0606978	-0.0172123	0.0120447	0.09691	-0.0829742	19
1	0	25	4	74	3	185	3	5	2	6	4	8	4	2	5	5	4	4	4	30	0	79	250	1146	0.30103	0	-0.477121	0.09691	0.30103	0.0362122	0.00692141	0.0487675	0.09691	0.0362122	25
1	1	5	5	70	4	170	4	2	2	5	5	8	5	2	6	1	6	2	4	55	0	70	160	511	0.221849	0	-0.477121	-0.60206	0	-0.662758	-0.0172123	0.0120447	-0.30103	-0.106455	18
1	0	20	5	70	5	165	5	8	4	4	5	6	2	2	6	2	6	1	6	53	0	63	185	228	0.124939	-0.124939	-0.477121	-0.30103	-0.30103	-0.0606978	-0.0172123	-0.000920255	0.30103	-0.185637	15
1	1	7	4	70	4	170	1	6	1	3	4	6	4	2	1	1	7	2	4	28	0	70	185	1021	0	-0.124939	-0.477121	-0.60206	0	-0.51663	-0.0172123	0.0120447	0.176091	-0.2156	14
1	1	30	3	71	4	190	3	6	1	5	3	5	3	2	5	3	5	5	4	32	0	69	185	169	0.221849	-0.20412	-0.477121	-0.124939	0.39794	0.115393	-0.011052	0.0603494	0.176091	-0.0606978	20
0	0	20	4	74	2	200	2	5	2	2	3	5	3	2	2	2	3	3	4	33	0	69	180	116	-0.176091	-0.20412	-0.477121	-0.30103	0.176091	-0.0606978	0.00692141	0.0826258	0.09691	-0.2156	14
0	1	20	6	71	4	200	4	5	4	5	5	5	6	2	5	5	5	5	4	38	1	68	195	254	0.221849	-0.20412	-0.477121	0.09691	0.39794	-0.0606978	-0.011052	0.0826258	0.09691	-0.0193052	22
0	0	15	6	72	4	180	2	5	5	2	4	5	5	2	6	4	5	2	6	37	0	67	160	256	-0.176091	-0.20412	-0.477121	0	0	-0.185637	-0.00497781	0.0368683	0.09691	-0.185637	15
1	1	13	4	71	2	165	2	4	1	2	2	5	3	2		2	3	2	4	47	1	65	145	317	-0.176091	-0.20412	-0.477121	-0.30103	0	-0.247784	-0.011052	-0.000920255	0	-0.247784	13
1	1	13	5	77	6	140	6	3	6	3	6	5	6	2	7	5	6	3	6	30	0	60	35	347	0	-0.20412	-0.477121	0.09691	0.176091	-0.247784	0.0241804	-0.0722762	-0.124939	-0.106455	18
1	1	10	4	70	4	210	4	5	1	5	4	5	4	2	5	3	5	2	5	57	0	71	205	182	0.221849	-0.20412	-0.477121	-0.124939	0	-0.361728	-0.0172123	0.103815	0.09691	-0.131279	17
1	1	10	5	70	6	175	5	2	4	5	4	5	6	2	6	3	6	2	6	51	1	66	110	281	0.221849	-0.20412	-0.477121	-0.124939	0	-0.361728	-0.0172123	0.0246338	-0.30103	-0.131279	17
1	0	5	3	71	3	170	3	6	2	12	3	5	4	2	5	3	5	5	3	56	1	67	132	376	0.60206	-0.20412	-0.477121	-0.124939	0.39794	-0.662758	-0.011052	0.0120447	0.176091	0.0696359	27
0	0	5	4	68		200	1	5	2	10	1	5	2	2	5	4	5	2	4	37	1	66	135	190	0.522879	-0.20412	-0.477121	0	0	-0.662758	-0.0298014	0.0826258	0.09691	0	23
1	1	30	6	72	4	190	4	4	4	9	6	4	4	2	4	6	4	4	4	25	1	71	150	326	0.477121	-0.30103	-0.477121	0.176091	0.30103	0.115393	-0.00497781	0.0603494	0	0.0362122	25
1	1	30	4	74	3	180	3	5	2	10	4	4	3	2	4	6	4	4	5	32	0	66	150	259	0.522879	-0.30103	-0.477121	0.176091	0.30103	0.115393	0.00692141	0.0368683	0.09691	0.0532455	26
1	0	20	2	69	2	150	3	4	1	3	2	4	2	2	2	2	3	3	3	33	0	77	193	280	0	-0.30103	-0.477121	-0.30103	0.176091	-0.0606978	-0.0234612	-0.0423129	0	-0.2156	14
0	1	20	5	70	4	175	3	3	2	5	3	4	3	2	4	4	4	3	4	49	0	72	176	308	0.221849	-0.30103	-0.477121	0	0.176091	-0.0606978	-0.0172123	0.0246338	-0.124939	-0.106455	18
1	1	20	4	72	3	150		5	2	5	4	4	4	2	4	5	4	1	4	38	1	59	95	257	0.221849	-0.30103	-0.477121	0.09691	-0.30103	-0.0606978	-0.00497781	-0.0423129	0.09691	-0.131279	17
1	0	20	4	71	2	197	4	5	4	8	5	4	4	2	5	1	5	5	6	30	0	75	205	235	0.425969	-0.30103	-0.477121	-0.60206	0.39794	-0.0606978	-0.011052	0.076062	0.09691	-0.0606978	20
1	0	10	4	72	4	180	4	5	3	7	5	4	4	2	5	3	4	3	5	63	0	69	195	181	0.367977	-0.30103	-0.477121	-0.124939	0.176091	-0.361728	-0.00497781	0.0368683	0.09691	-0.0829742	19
1	1	8	6	72	4	185	4	3	5	3	6	4	5	2	6	1	7	1	6	48	1	66	165	277	0	-0.30103	-0.477121	-0.60206	-0.30103	-0.458638	-0.00497781	0.0487675	-0.124939	-0.320335	11
1	0	20	6	71	5	200	5	6	5	5	5	3	5	2	6	3	6	2	5	27	0	69	195	140	0.221849	-0.425969	-0.477121	-0.124939	0	-0.0606978	-0.011052	0.0826258	0.176091	-0.185637	15
1	0	20	3	70	2	150	2	3	2	4	3	3	3	2	3	4	3	2	5	36	1	65	200	217	0.124939	-0.425969	-0.477121	0	0	-0.0606978	-0.0172123	-0.0423129	-0.124939	-0.185637	15
1	0	16	4	71	3	165	2	5	3	7	5	3	4	2	6	2	5	2	5	31	0	71	130	254	0.367977	-0.425969	-0.477121	-0.30103	0	-0.157608	-0.011052	-0.000920255	0.09691	-0.157608	16
0	1	12	5	70	4	175	4	4	3	6	4	3	4	2	4	4	4	4	4	50	0	75	205	340	0.30103	-0.425969	-0.477121	0	0.30103	-0.282547	-0.0172123	0.0246338	0	-0.0829742	19
1	1	10	4	71	2	175	3	3	2	2	4	3	4	2	4	2	3	1	4	29	0	68	145	116	-0.176091	-0.425969	-0.477121	-0.30103	-0.30103	-0.361728	-0.011052	0.0246338	-0.124939	-0.361728	10
0	1	8	4	71	5	180	4	4	4	4	4	3	5	2	5	3	5	4	4	22	1	59	110	511	0.124939	-0.425969	-0.477121	-0.124939	0.30103	-0.458638	-0.011052	0.0368683	0	-0.157608	16
0	1	6	5	71	3	180	4	3	2	3	4	3	3	2	5	2	6	1	7	30	0	73	165	261	0	-0.425969	-0.477121	-0.30103	-0.30103	-0.583577	-0.011052	0.0368683	-0.124939	-0.320335	11
0	0	5	4	72	4	180	5	8	2	12	4	3	6	2	4	3	4	2	6	28	0	71	160	198	0.60206	-0.425969	-0.477121	-0.124939	0	-0.662758	-0.00497781	0.0368683	0.30103	-0.0193052	22
0	1	5	4	70	5	170	4	3	3	5	3	3	2	2	6	4	4	10	2	34	0	73	225	207	0.221849	-0.425969	-0.477121	0	0.69897	-0.662758	-0.0172123	0.0120447	-0.124939	0.0184834	24
0	1	5	6	72	4	190	5	3	5	4	5	3	6	2	6	5	6	3	6	45	0	70	200	260	0.124939	-0.425969	-0.477121	0.09691	0.176091	-0.662758	-0.00497781	0.0603494	-0.124939	-0.131279	17
1	0	27	2	71	2	157	1	4	1	5	3	2	2	2	5	3	4	2	4	27	0	70	153	251	0.221849	-0.60206	-0.477121	-0.124939	0	0.0696359	-0.011052	-0.0225045	0	-0.2156	14
1	0	10	6	68	6	168	5	4	5	10	6	2	6	2	7	2	6	5	6	29	1	63	163	386	0.522879	-0.60206	-0.477121	-0.30103	0.39794	-0.361728	-0.0298014	0.00690508	0	-0.0395085	21
0	0	10	5	72	4	185	4	8	5	4	4	2	5	2	4	2	4	2	5	42	1	68	155	584	0.124939	-0.60206	-0.477121	-0.30103	0	-0.361728	-0.00497781	0.0487675	0.30103	-0.282547	12
0	0	8	6	71	6	185	6	6	5	5	6	2	6	2	6	2	6	1	6	30	0	73	190	273	0.221849	-0.60206	-0.477121	-0.30103	-0.30103	-0.458638	-0.011052	0.0487675	0.176091	-0.282547	12
0	0	8	5	70	3	172	3	8	1	3	5	2	5	2	5	3	5	3	4	29	0	65	125	272	0	-0.60206	-0.477121	-0.124939	0.176091	-0.458638	-0.0172123	0.0171242	0.30103	-0.247784	13
0	0	5	4	67	5	150	6	3	5	3	4	2	4	2	4	1	4	2	4	34	0	65	190	241	0	-0.60206	-0.477121	-0.60206	0	-0.662758	-0.0362355	-0.0423129	-0.124939	-0.361728	10
0	1	5	4	71	3	180	4	4	2	12	3	2	4	2	4	2	3	5	4	29	0	74	195	196	0.60206	-0.60206	-0.477121	-0.30103	0.39794	-0.662758	-0.011052	0.0368683	0	0	23
1	1	20	3	75	3	195	2	4	2	5	4	1	5	2	5	3	5	3	5	47	0	70		466	0.221849	-0.90309	-0.477121	-0.124939	0.176091	-0.0606978	0.012751	0.0716304	0	-0.2156	14
0	1	3	4	71	3	190	4	6	3	4	3	8	3	1	4	2	5	4	4	44	1	60	100	162	0.124939	0	-0.778151	-0.30103	0.30103	-0.884607	-0.011052	0.0603494	0.176091	-0.0829742	19
0	0	10	6	71	6	190	6	5	6	2	5	6	4	1	6	2	6	2	6	35	1	68	210	257	-0.176091	-0.124939	-0.778151	-0.30103	0	-0.361728	-0.011052	0.0603494	0.09691	-0.247784	13
0	1	10	6	71	4	170	4	3	3	5	4	5	4	1	7	3	6	2	6	34	0	68	125	188	0.221849	-0.20412	-0.778151	-0.124939	0	-0.361728	-0.011052	0.0120447	-0.124939	-0.157608	16
1	1	7	4	72	2	140	2	5	4	10	4	5	4	1	4	3	4	2	6	42	1	65	165	219	0.522879	-0.20412	-0.778151	-0.124939	0	-0.51663	-0.00497781	-0.0722762	0.09691	-0.0395085	21
0	1	10	4	70	3	200	4	4	3	3	3	4	4	1	4	3	4	1	4	35	1	63	115	131	0	-0.30103	-0.778151	-0.124939	-0.30103	-0.361728	-0.0172123	0.0826258	0	-0.282547	12
0	1	5	5	74	4	185	3	4	4	4	4	4	4	1	6	5	4	3	6	26	1	67	320	252	0.124939	-0.30103	-0.778151	0.09691	0.176091	-0.662758	0.00692141	0.0487675	0	-0.131279	17
0	1	6	4	72	4	175	4	3	1	5	2	3	3	1	4	4	4	1	5	47	1	65	250	168	0.221849	-0.425969	-0.778151	0	-0.30103	-0.583577	-0.00497781	0.0246338	-0.124939	-0.2156	14
1	0	5	3	70	2	180	3	8	1	5	3	3	4	1	6	2	5	2	4	41	0	79	245	442	0.221849	-0.425969	-0.778151	-0.30103	0	-0.662758	-0.0172123	0.0368683	0.30103	-0.247784	13
1	1	15	5	71	4	165	5	5	4			2	4	1	7	4	4	2	5	49	1	72	250	208		-0.60206	-0.778151	0	0	-0.185637	-0.011052	-0.000920255	0.09691
0	0	5	4	71	5	190	4	2	4	3	5	2	5	1	5	2	6	2	4	71	1	66	120	374	0	-0.60206	-0.778151	-0.30103	0	-0.662758	-0.011052	0.0603494	-0.30103	-0.361728	10
0	1	15	4	70	1	180	4	2	1	5	4	5	4	0	7	2	7	3	4	28	0	69	120	466	0.221849	-0.20412		-0.30103	0.176091	-0.185637	-0.0172123	0.0368683	-0.30103	-0.185637	15
