# Supplementary material for: Improving Time Estimation in Witness Memory
Source: Front Psychol. 2019 Jun 27;10:1452. doi: 10.3389/fpsyg.2019.01452 (PMC6621925; doi:10.3389/fpsyg.2019.01452)
Supplement: Supplementary file 4 [file Data_Sheet_3.xlsx]

## Sheet: Study 3
Data for Study 3
Form	Total	TotCon	PlayPhone	PPCon	Compare	CompCon	Pocket	PockCon	PlayTablet	PTCon	Age	Gender	LPEtotal	LPEplayphone	LPEcompare	LPEpocket	LPEplaytablet	Sum	LPEsum
1	120	7	60	6	15	6	50	5	10	7	24	0	0.547702	0.547702	0.574031	1.09691	0.0457575	135	0.598855
1	120	3	40	5	10	4	5	4	40	4	30	1	0.547702	0.371611	0.39794	0.09691	0.647817	95	0.446245
1	120	3	120	4	60	4	5	4	3	4	38	1	0.547702	0.848732	1.17609	0.09691	-0.477121	188	0.742679
1	120	4	70	4	30	4	10	4	20	4	37	1	0.547702	0.614649	0.875061	0.39794	0.346787	130	0.582464
0	120	1	115	3	10	2	5	1	5	1	34	1	0.547702	0.830249	0.39794	0.09691	-0.255273	135	0.598855
1	120	4	60	4	10	2	2	6	10	4	38	0	0.547702	0.547702	0.39794	-0.30103	0.0457575	82	0.382335
1	100	3	35	3	10	3	2	2	5	2	35	1	0.468521	0.313619	0.39794	-0.30103	-0.255273	52	0.184524
1	100	5	60	4	20	6	3	6	5	6	54	1	0.468521	0.547702	0.69897	-0.124939	-0.255273	88	0.413004
1	100	4	60	4	10	4	1	4	4	4	35	0	0.468521	0.547702	0.39794	-0.60206	-0.352183	75	0.343582
0	90	6	75	6	10	7	3	6	10	7	38	1	0.422764	0.644612	0.39794	-0.124939	0.0457575	98	0.459747
0	90	1	90	1	10	1	1	3	5	1	37	1	0.422764	0.723794	0.39794	-0.60206	-0.255273	106	0.493827
1	85	1	50	1	20	1	3	1	10	1	25	0	0.39794	0.468521	0.69897	-0.124939	0.0457575	83	0.387599
1	75	4	45	5	9	7	3	6	5	7	30	1	0.343582	0.422764	0.352183	-0.124939	-0.255273	62	0.260913
1	65	4	50	5	20	5	5	6	10	3	44	0	0.281434	0.468521	0.69897	0.09691	0.0457575	85	0.39794
1	60	4	30	6	15	5	5	4	10	4	42	0	0.246672	0.246672	0.574031	0.09691	0.0457575	60	0.246672
0	60	3	25	3	12	3	4	4	14	2	62	0	0.246672	0.167491	0.477121	0	0.191886	55	0.208884
0	60	5	20	5	5	5	2	5	10	6	31	1	0.246672	0.0705811	0.09691	-0.30103	0.0457575	37	0.0367228
1	60	6	55	5	6	5	2	6	4	6	36	0	0.246672	0.509914	0.176091	-0.30103	-0.352183	67	0.294596
1	60	4	20	4	20	4	5	4	3	5	45	1	0.246672	0.0705811	0.69897	0.09691	-0.477121	48	0.149762
1	60	5	60	4	15	5	2	6	5	5	45	0	0.246672	0.547702	0.574031	-0.30103	-0.255273	82	0.382335
0	60	4	30	3	15	3	45	1	10	3	23	1	0.246672	0.246672	0.574031	1.05115	0.0457575	100	0.468521
1	60	4	20	1	6	4	5	4	6	5	29	1	0.246672	0.0705811	0.176091	0.09691	-0.176091	37	0.0367228
1	60	4	45	5	10	4	3	4	5	4	39	1	0.246672	0.422764	0.39794	-0.124939	-0.255273	63	0.267862
1	59	1	40	1	15	1	3	2	10	1	39	0	0.239373	0.371611	0.574031	-0.124939	0.0457575	68	0.30103
0	55	6	40	6	45	5	5	7	10	5	30	0	0.208884	0.371611	1.05115	0.09691	0.0457575	100	0.468521
1	50	4	30	4	5	4	2	5	5	5	30	0	0.167491	0.246672	0.09691	-0.30103	-0.255273	42	0.0917704
1	45	6	40	6	10	4	3	6	4	6	32	1	0.121734	0.371611	0.39794	-0.124939	-0.352183	57	0.224396
1	45	7	20	4	5	4	1	7	5	4	35	0	0.121734	0.0705811	0.09691	-0.60206	-0.255273	31	-0.0401172
0	45	4	40	3	15	2	1	6	12	3	35	0	0.121734	0.371611	0.574031	-0.60206	0.124939	68	0.30103
0	45	5	20	6	10	5	5	6	10	5	24	0	0.121734	0.0705811	0.39794	0.09691	0.0457575	45	0.121734
1	45	5	15	4	3	4	2	3	3	3	36	1	0.121734	-0.0543577	-0.124939	-0.30103	-0.477121	23	-0.169751
1	45	3	30	4	10	4	2	5	5	5	57	0	0.121734	0.246672	0.39794	-0.30103	-0.255273	47	0.140619
1	45	4	35	4	10	6	2	6	5	5	32	1	0.121734	0.313619	0.39794	-0.30103	-0.255273	52	0.184524
1	45	4	15	5	5	5	2	4	3	4	41	1	0.121734	-0.0543577	0.09691	-0.30103	-0.477121	25	-0.133539
0	45	6	30	6	5	4	1	7	5	4	29	0	0.121734	0.246672	0.09691	-0.60206	-0.255273	41	0.0813049
0	40	6	60	5	15	6	2	7	15	5	32	0	0.0705811	0.547702	0.574031	-0.30103	0.221849	92	0.432309
1	40	4	20	5	4	3	2	4	4	5	30	0	0.0705811	0.0705811	0	-0.30103	-0.352183	30	-0.0543577
1	40	2	30	1	5	11	1	5	3	5	27	1	0.0705811	0.246672	0.09691	-0.60206	-0.477121	39	0.0595857
1	40	6	20	5	3	4	3	5	5	3	27	0	0.0705811	0.0705811	-0.124939	-0.124939	-0.255273	31	-0.0401172
1	40	6	15	4	5	6	2	5	2	4	30	1	0.0705811	-0.0543577	0.09691	-0.30103	-0.653213	24	-0.151268
1	40	4	10	4	5	4	1	7	3	4	37	0	0.0705811	-0.230449	0.09691	-0.60206	-0.477121	19	-0.252725
0	40	4	20	5	5	5	2	6	10	5	47	1	0.0705811	0.0705811	0.09691	-0.30103	0.0457575	37	0.0367228
1	35	5	30	7	5	6	2	7	5	5	31	0	0.0125891	0.246672	0.09691	-0.30103	-0.255273	42	0.0917704
1	35	6	20	7	8	4	3	5	6	5	30	0	0.0125891	0.0705811	0.30103	-0.124939	-0.176091	37	0.0367228
1	35	3	30	4	10	5	5	4	5	5	27	1	0.0125891	0.246672	0.39794	0.09691	-0.255273	50	0.167491
1	35	3	20	5	2	6	1	7	4	3	31	0	0.0125891	0.0705811	-0.30103	-0.60206	-0.352183	27	-0.100115
0	34	2	27	2	10	3	2	4	2	4	30	0	0	0.200915	0.39794	-0.30103	-0.653213	41	0.0813049
1	34	6	20	6	6	6	2	6	4	6	26	0	0	0.0705811	0.176091	-0.30103	-0.352183	32	-0.0263289
1	32	4	20	4	6	3	2	5	4	4	29	1	-0.0263289	0.0705811	0.176091	-0.30103	-0.352183	32	-0.0263289
1	31	5	16	6	4	5	3	5	3	5	31	0	-0.0401172	-0.0263289	0	-0.124939	-0.477121	26	-0.116506
1	30	4	15	4	5	5	2	6	4	4	28	0	-0.0543577	-0.0543577	0.09691	-0.30103	-0.352183	26	-0.116506
0	30	5	25	4	5	5	2	6	5	5	37	0	-0.0543577	0.167491	0.09691	-0.30103	-0.255273	37	0.0367228
0	30	5	20	5	5	6	3	7	15	4	40	0	-0.0543577	0.0705811	0.09691	-0.124939	0.221849	43	0.10199
1	30	4	20	4	5	6	1	6	3	4	41	0	-0.0543577	0.0705811	0.09691	-0.60206	-0.477121	29	-0.0690809
0	30	4	25	3	10	5	3	6	8	4	25	0	-0.0543577	0.167491	0.39794	-0.124939	-0.0511525	46	0.131279
1	30	4	25	4	5	4	2	4	4	4	37	1	-0.0543577	0.167491	0.09691	-0.30103	-0.352183	36	0.0248236
0	30	5	20	5	3	4	1	7	1	2	33	0	-0.0543577	0.0705811	-0.124939	-0.60206	-0.954243	25	-0.133539
1	30	5	30	5	5	5	2	5	5	5	34	0	-0.0543577	0.246672	0.09691	-0.30103	-0.255273	42	0.0917704
1	30	3	20	4	3	3	2	2	2	3	39	1	-0.0543577	0.0705811	-0.124939	-0.30103	-0.653213	27	-0.100115
0	30	4	20	4	5	4	2	4	3	4	35	0	-0.0543577	0.0705811	0.09691	-0.30103	-0.477121	30	-0.0543577
0	30	6	25	6	7	5	2	5	7	5	33	0	-0.0543577	0.167491	0.243038	-0.30103	-0.109144	41	0.0813049
1	30	6	20	6	3	6	1	6	4	6	30	0	-0.0543577	0.0705811	-0.124939	-0.60206	-0.352183	28	-0.0843209
0	30	6	30	7	8	3	2	4	6	1	33	0	-0.0543577	0.246672	0.30103	-0.30103	-0.176091	46	0.131279
1	30	6	20	6	5	6	2	6	5	6	59	1	-0.0543577	0.0705811	0.09691	-0.30103	-0.255273	32	-0.0263289
0	30	6	15	5	5	4	3	4	4	5	26	0	-0.0543577	-0.0543577	0.09691	-0.124939	-0.352183	27	-0.100115
0	30	4	20	3	5	5	1	6	4	5	30	0	-0.0543577	0.0705811	0.09691	-0.60206	-0.352183	30	-0.0543577
0	30	6	30	6	10	6	2	6	5	6	25	0	-0.0543577	0.246672	0.39794	-0.30103	-0.255273	47	0.140619
1	30	4	15	3	5	4	3	6	8	4	40	1	-0.0543577	-0.0543577	0.09691	-0.124939	-0.0511525	31	-0.0401172
0	30	3	30	5	10	5	10	5	15	3	30	0	-0.0543577	0.246672	0.39794	0.39794	0.221849	65	0.281434
0	30	5	20	5	5	6	2	6	3	4	29	0	-0.0543577	0.0705811	0.09691	-0.30103	-0.477121	30	-0.0543577
0	25	5	12	4	5	4	2	5	3	4	21	0	-0.133539	-0.151268	0.09691	-0.30103	-0.477121	22	-0.189056
0	25	4	7	3	4	4	2	4	4	2	27	0	-0.133539	-0.385351	0	-0.30103	-0.352183	17	-0.30103
0	25	3	20	4	2	4	2	4	1	4	25	0	-0.133539	0.0705811	-0.30103	-0.30103	-0.954243	25	-0.133539
0	20	4	18	4	1	4	1	4	1	4	34	0	-0.230449	0.0248236	-0.60206	-0.60206	-0.954243	21	-0.20926
0	20	6	6	6	8	6	2	6	4	6	26	1	-0.230449	-0.452298	0.30103	-0.30103	-0.352183	20	-0.230449
0	20	7	15	7	5	6	2	7	4	6	28	0	-0.230449	-0.0543577	0.09691	-0.30103	-0.352183	26	-0.116506
0	20	5	10	6	5	4	5	6	2	2	32	1	-0.230449	-0.230449	0.09691	0.09691	-0.653213	22	-0.189056
0	20	4	10	4	10	4	5	5	5	4	41	1	-0.230449	-0.230449	0.39794	0.09691	-0.255273	30	-0.0543577
0	20	2	10	6	5	4	4	7	7	6	22	0	-0.230449	-0.230449	0.09691	0	-0.109144	26	-0.116506
0	15	5	12	4	3	5	1	6	2	5	34	0	-0.355388	-0.151268	-0.124939	-0.60206	-0.653213	18	-0.276206
0	15	4	10	3	3	4	2	2	6	1	35	1	-0.355388	-0.230449	-0.124939	-0.30103	-0.176091	21	-0.20926
0	15	4	7	3	2	4	2	6	2	5	33	1	-0.355388	-0.385351	-0.30103	-0.30103	-0.653213	13	-0.417536
0	15	4	15	4	7	4	1	4	3	3	29	0	-0.355388	-0.0543577	0.243038	-0.60206	-0.477121	26	-0.116506
1	15	5	5	4	3	4	1	5	3	4	27	0	-0.355388	-0.531479	-0.124939	-0.60206	-0.477121	12	-0.452298
0	12	1	20	1	6	2	2	4	3	2	27	0	-0.452298	0.0705811	0.176091	-0.30103	-0.477121	31	-0.0401172
0	12	4	5	3	4	4	2	4	3	4	29	0	-0.452298	-0.531479	0	-0.30103	-0.477121	14	-0.385351
1	12	3	5	3	2	3	2	2	3	3	44	1	-0.452298	-0.531479	-0.30103	-0.30103	-0.477121	12	-0.452298
